# Supplementary material for: The first example of a centro-symmetrical bis(imido)-bridged dinuclear cobalt(iii) complex: synthesis via oxidative dehydrogenation and phenoxazinone synthase activity
Source: Royal Society of Chemistry journal article supplement (doi:10.1039/c3dt32788d), 2013-01-01
Supplement: c3dt32788d.pdf [file c3dt32788d.pdf]

## Supporting Information

# The first example of centro-symmetrical bis(imido)-bridged dinuclear cobalt(III) complex: synthesis via oxidative dehydrogenation and phenoxazinone synthase activity

Anangamohan Panja<sup>\*,a,b,c</sup> and Philippe Guionneau<sup>a,b</sup>

<sup>a</sup>CNRS, ICMCB, Groupe des Sciences Moléculaires, UPR 9048, F-33608 Pessac, France

<sup>b</sup>Université de Bordeaux, ICMCB, UPR 9048, Pessac, F-33600, France

<sup>c</sup>Postgraduate Department of Chemistry, Panskura Banamali College, Panskura RS, Purba Medinipur, West Bengal 721152, India

### Corresponding Author

E-mail: ampanja@yahoo.co.in (A. P.)

## Contents

**Figure S1:** Absorption spectra of cobalt(II)-bound 2-aminomethylpyridine in alkaline media; before and after the addition of hydrogen peroxide.

**Figure S2:** The molecular packing of the complex.

**Figure S3.** Mass spectrum of complex **1** in methanol

**Figure S4.** IR spectra

**Figure S5.** Cyclic voltammogram of 2-aminophenol

**Figure S6.** Rate dependency on catalyst concentrations

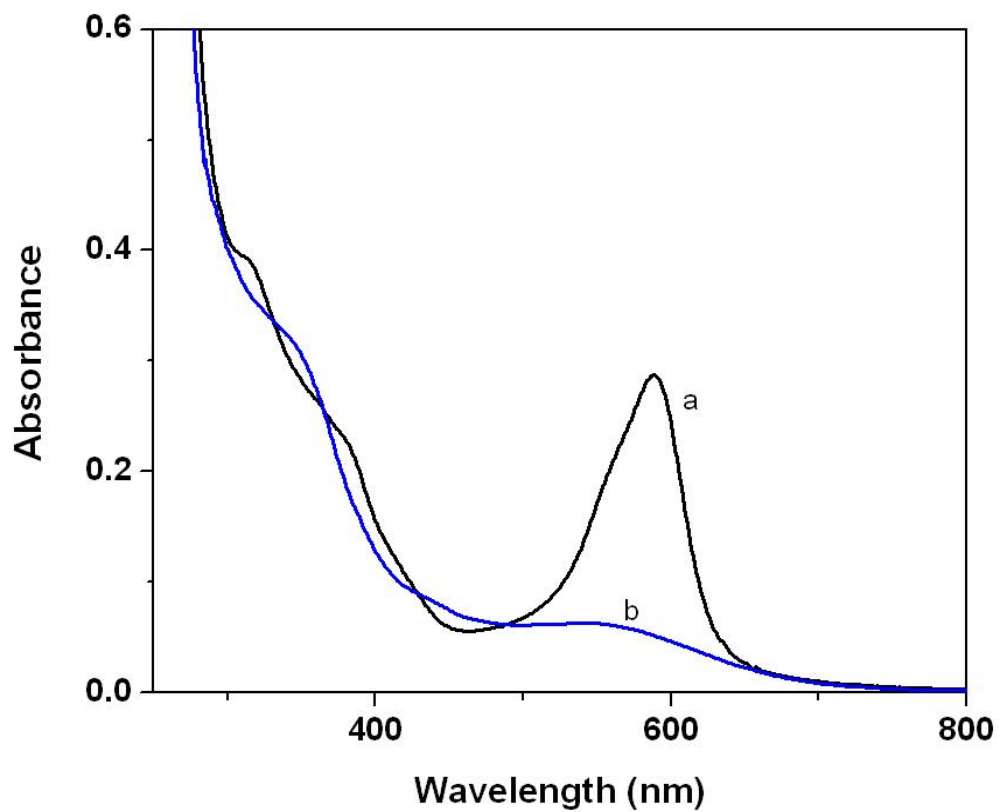

**Figure S1.** Absorption spectra of cobalt(II)-bound 2-aminomethylpyridine in alkaline media; before (a) and after (b) the addition of hydrogen peroxide.

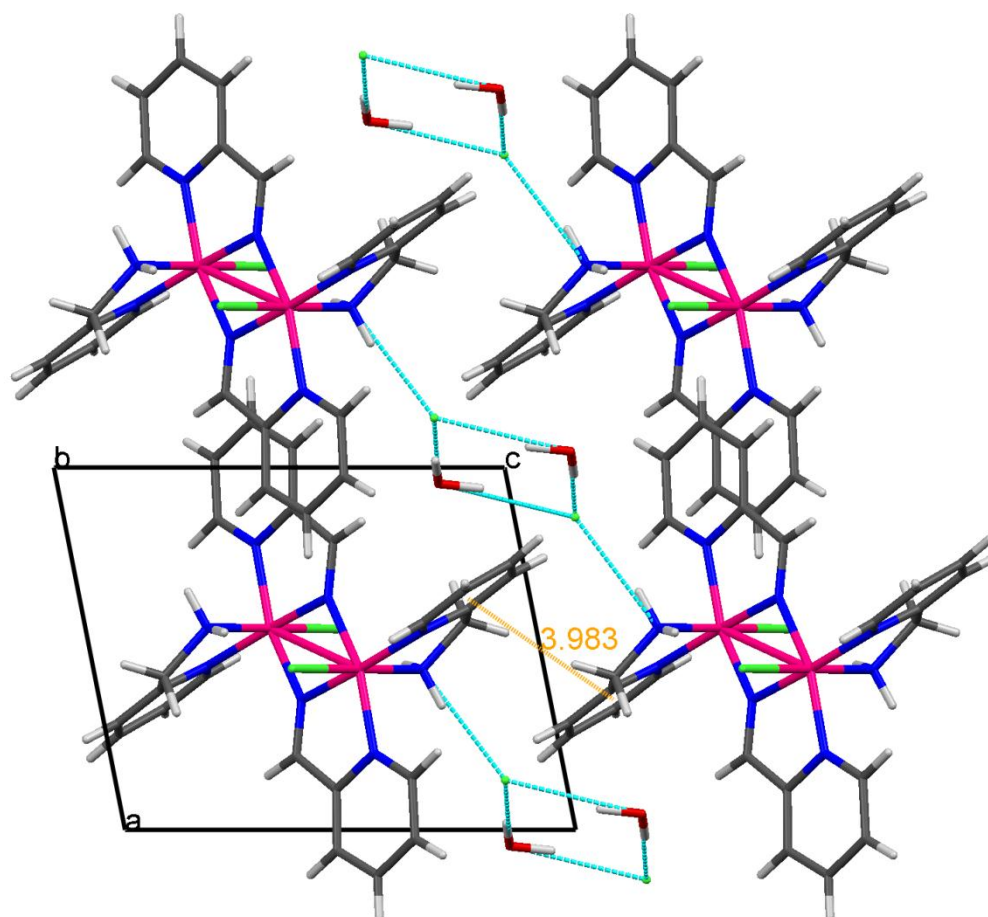

**Figure S2:** The molecular packing of the complex showing  $\pi \cdots \pi$  stacking and hydrogen bonding interactions.

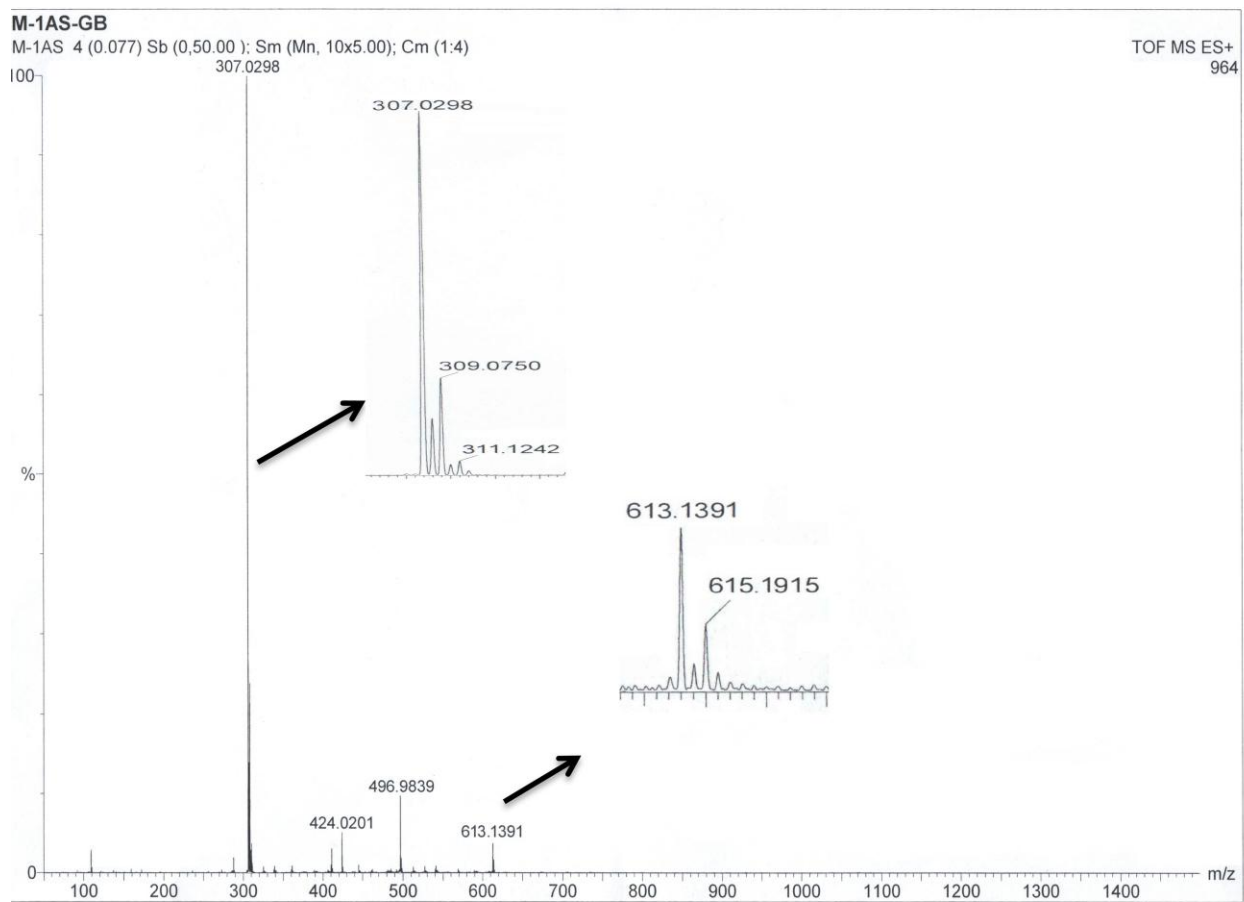

**Figure S3.** Mass spectrum of complex **1** in methanol

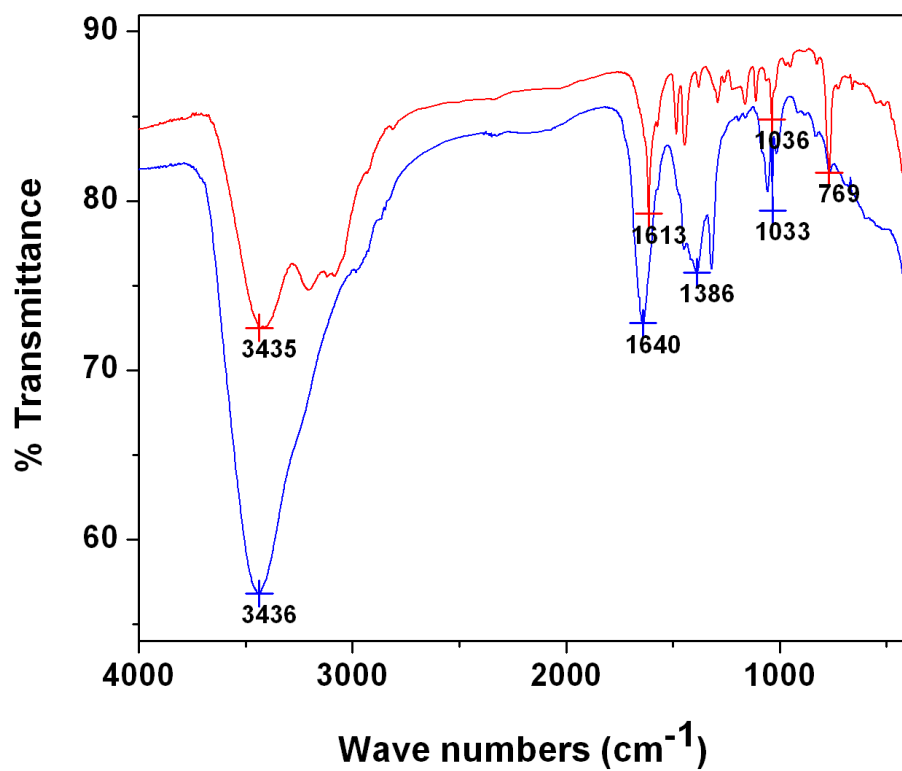

**Figure S4.** IR spectra of a mixture of cobalt(II) chloride and 2-aminomethylpyridine in 1: 2 molar ratio in methanol (red), and upon addition of alkaline hydrogen peroxide (blue).

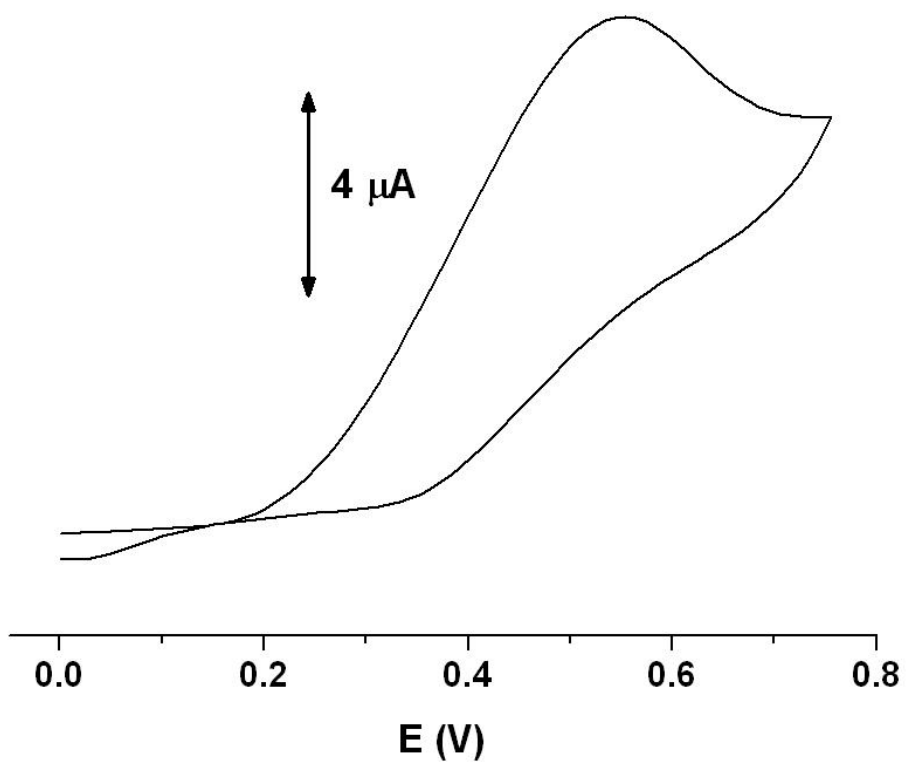

**Figure S5.** Cyclic voltammogram of 2-aminophenol in methanol containing TBAP as supporting electrolyte at a scan rate of 100 mV/s.

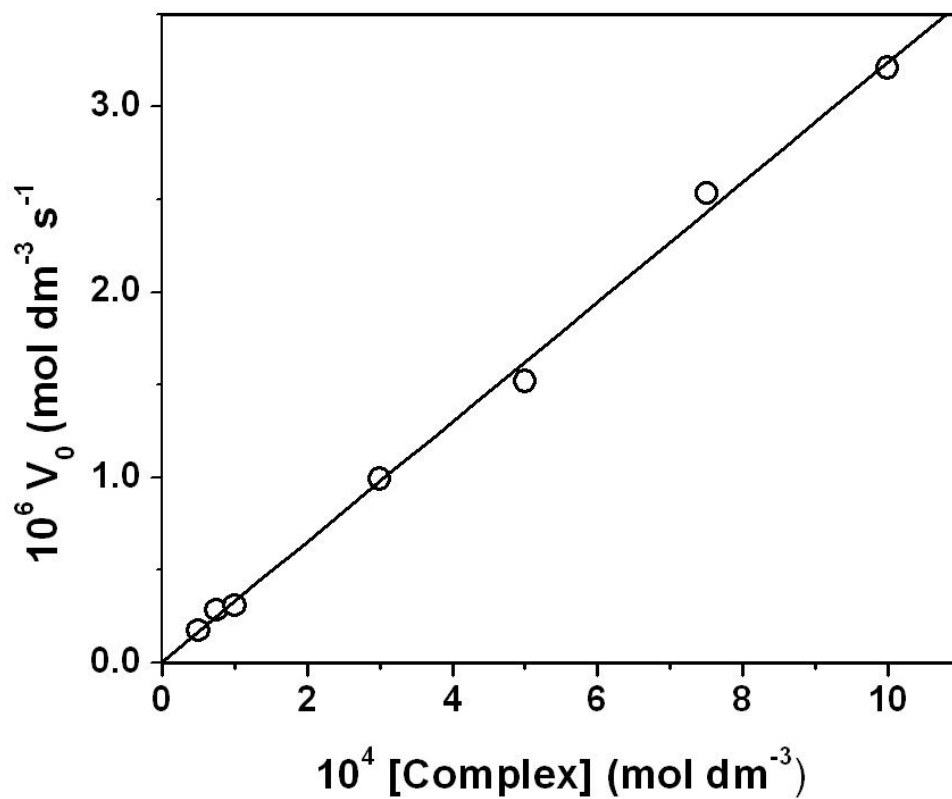

**Figure S6.** Plot of the reaction rates on the complex concentrations for the oxidation of 2-aminophenol catalyzed by the complex in dioxygen-saturated methanol at 25 °C
